# Supplementary material
Source: publisher figshare collection journal article supplement (https://gsajournals.figshare.com/articles/dataset/_/7543436)
Supplement: Supplementary file 1 [file 1]

## Sheet: Sheet1
Supplementary Table 1: Accession numbers frog skin transcriptomes used in the analysis
Frog Species	Accession Number	BioProject Number
Agalychnis callidryas	SRX689286	PRJNA259743
Atelopus glyphus	SRX690980	PRJNA259720
Bombina maxima	SRX185157	PRJNA174732
Craugastor fitzingeri	SRX689259	PRJNA259742
Fejervarya limnocharis	SRX683581	PRJNA258254
Odorrana margaretae	SRX1368943	PRJNA299518
Paa boulengeri	SRX1453517	PRJNA304335
Pelophylax nigromaculatus	SRX1368943	PRJNA299518
Polypedates megacephalus	SRX1368943	PRJNA299518
Rana catesbeiana	SRX2989058	PRJNA392411
Rhacophorus dennysi	SRX1368943	PRJNA299518
Xenopus laevis	SRX1286482	PRJNA296921
