# Supplementary material
Source: publisher figshare collection journal article supplement (https://gsajournals.figshare.com/articles/dataset/_/7543436)

Supplemental Figure 1. AMP diversity among frog transcriptomes. Black box = present; gray = not observed. The AMP phylogenetic tree below is based on MUSCLE alignment of AMP sequences and constructed using neighbor-joining with no outgroup. Numbers of nodes represent 100 bootstrap replicates.

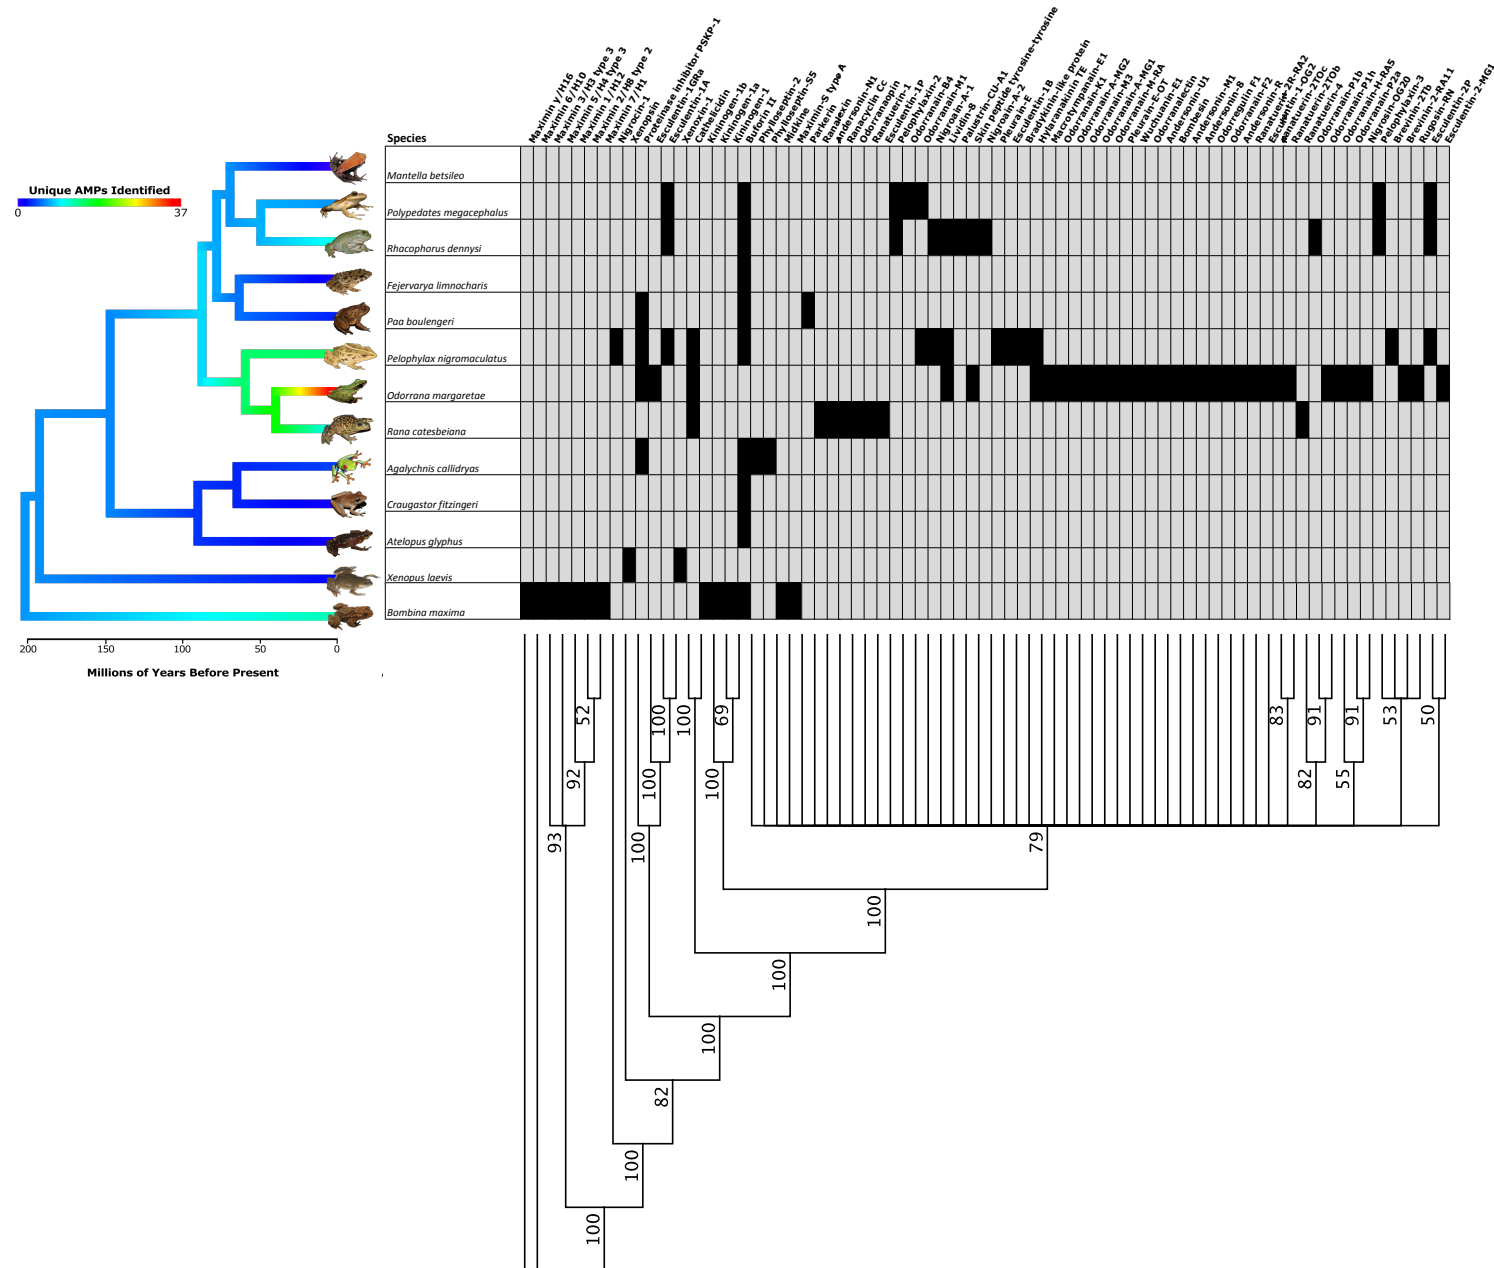

Supplement: Supplementary file 1 [file 1]
