# Supplementary material
Source: publisher figshare collection journal article supplement (https://gsajournals.figshare.com/articles/dataset/_/7543436)

Supplemental Figure 2. MUSCLE alignments of the signal (**A**) and bioactive (**B**) regions of AMP sequences. The signal region is more conserved across lineages (Pairwise identity = 54.1%) compared with the bioactive region (Pairwise identity = 12.6%).

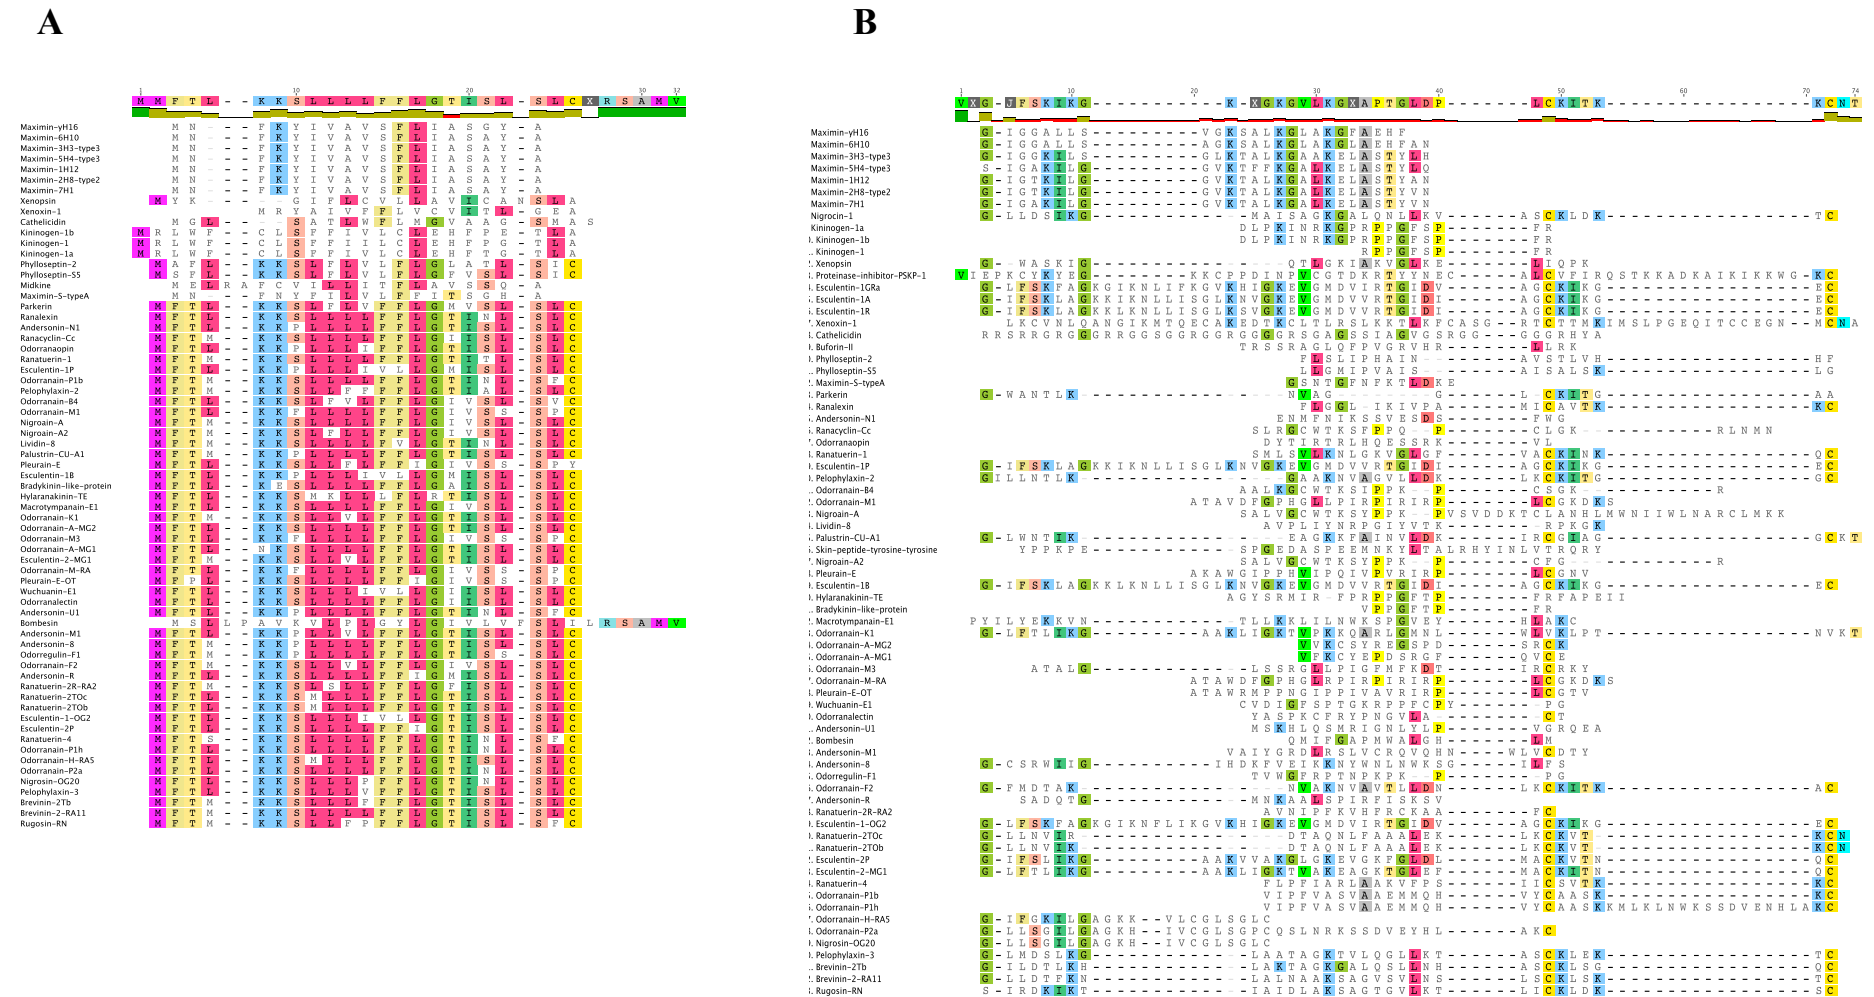

Supplement: Supplementary file 2 [file 1]
